# Supplementary material
Source: PubMed Central journal article supplement (PMC4571701)
Supplement: rspb20151369supp1.pdf [file rspb20151369supp1.pdf]

## Electronic supplementary material A

**Table S1.** Descriptive statistics of land cover (in %) within landscape sectors of 750 m radius around focal fields. Shown are arithmetic means (Mean), standard errors (SE), minima (Min) and maxima (Max). Intensively cultivated grassland is included into crop area.

| Landscape category                 | Mean | SE  | Min  | Max  |
|------------------------------------|------|-----|------|------|
| Crop area                          | 53.0 | 3.3 | 25.3 | 92.0 |
| Extensively cultivated hay meadows | 4.3  | 0.4 | 1.6  | 7.5  |
| Extensively cultivated pastures    | 0.4  | 0.1 | 0.0  | 1.5  |
| Perennial wildflower strips        | 0.4  | 0.1 | 0.0  | 2.0  |
| Forest                             | 20.3 | 3.4 | 0.0  | 57.6 |
| Fruit plantations                  | 1.9  | 0.3 | 0.0  | 5.1  |
| Gravel                             | 0.9  | 0.5 | 0.0  | 12.3 |
| Hedgerows                          | 0.5  | 0.1 | 0.0  | 2.6  |
| Other, undefined areas             | 3.8  | 0.6 | 0.1  | 11.9 |
| Sealed area                        | 4.7  | 0.1 | 3.6  | 6.7  |
| Settlements                        | 8.5  | 1.9 | 0.0  | 42.8 |
| Single trees                       | 0.1  | 0.1 | 0.0  | 2.2  |
| Vineyards                          | 0.1  | 0.1 | 0.0  | 1.4  |
| Water                              | 1.2  | 0.4 | 0.0  | 7.3  |

**Table S2:** Composition of seed mixture used for flower strips

| Plant species                            | Seed quantity [kg/ha] |
|------------------------------------------|-----------------------|
| <i>Anethum graveolens</i> L.             | 0.13                  |
| <i>Anthemis arvensis</i> L.              | 0.43                  |
| <i>Anthriscus cerefolium</i> (L.) HOFFM. | 0.23                  |
| <i>Centaurea cyanus</i> L.               | 1.33                  |
| <i>Coriandrum sativum</i> L.             | 0.73                  |
| <i>Fagopyrum esculentum</i> MOENCH       | 15.00                 |
| <i>Papaver rhoeas</i> L.                 | 0.13                  |

**Table S3:** Timeline illustrating the chronological order of the sampling (dark shaded boxes). Samples with identical letters were aggregated for the statistical analysis.

| Month<br>Activity                 | Week | May |    |    |    |    | June |    |    |    | July |    |    |    |
|-----------------------------------|------|-----|----|----|----|----|------|----|----|----|------|----|----|----|
|                                   |      | 18  | 19 | 20 | 21 | 22 | 23   | 24 | 25 | 26 | 27   | 28 | 29 | 30 |
| CLB larvae: counts on tillers     |      |     |    |    |    |    |      |    |    |    |      |    |    |    |
| CLB plant damage assessment       |      |     |    |    |    |    |      |    |    |    |      |    |    |    |
| CLB adults: sweep netting         |      |     |    |    |    |    |      |    |    |    |      |    |    |    |
| Natural enemies: pitfall trapping |      |     |    |    |    | A  | A    |    |    |    | A    |    |    |    |
| Natural enemies: sweep netting    |      |     |    |    |    |    |      |    | B  |    |      |    | B  |    |

**Table S4:** Summary of landscape effects (landscape complexity calculated as percentage non-crop area of 750 m radius landscape sectors around focal fields) and their interactions with treatment (tailored flower strip present or not) on different natural enemy groups of cereal leaf beetles in adjacent winter wheat fields and within the strips themselves. Degrees of freedom (df), Chi-square values ( $\chi^2$ ) and *P*-values from likelihood-ratio tests of the model selection procedure (see Methods section) are shown. *P*-values of explanatory variables that were included in the final model are in bold lettering.

|                                    | Within winter wheat |          |              | Within strip |          |          |
|------------------------------------|---------------------|----------|--------------|--------------|----------|----------|
|                                    | df                  | $\chi^2$ | <i>P</i>     | df           | $\chi^2$ | <i>P</i> |
| Ground beetles (adults)            |                     |          |              |              |          |          |
| Landscape                          | 1                   | 1.27     | 0.260        | 1            | 2.37     | 0.123    |
| Treatment x landscape              | 1                   | 0.10     | 0.747        | 1            | 0.92     | 0.338    |
| Predatory bugs (adults and nymphs) |                     |          |              |              |          |          |
| Landscape                          | 1                   | 3.81     | 0.051        | 1            | 1.59     | 0.207    |
| Treatment x landscape              | 1                   | 0.30     | 0.582        | 1            | 3.47     | 0.062    |
| Lacewings (adults)                 |                     |          |              |              |          |          |
| Landscape                          | 1                   | 2.06     | 0.151        | 1            | 1.84     | 0.175    |
| Treatment x landscape              | 1                   | 1.62     | 0.204        | 1            | 0.23     | 0.632    |
| Lacewings (larvae)                 |                     |          |              |              |          |          |
| Landscape                          | 1                   | 2.95     | 0.086        | 1            | 2.85     | 0.091    |
| Treatment x landscape              | 1                   | 2.07     | 0.150        | 1            | 1.03     | 0.309    |
| Ladybirds (adults)                 |                     |          |              |              |          |          |
| Landscape                          | 1                   | 0.18     | 0.667        | 1            | 0.17     | 0.679    |
| Treatment x landscape              | 1                   | 0.15     | 0.701        | 1            | 0.86     | 0.352    |
| Ladybirds (larvae)                 |                     |          |              |              |          |          |
| Landscape                          | 1                   | 0.14     | 0.706        | 1            | 0.01     | 0.937    |
| Treatment x landscape              | 1                   | 4.99     | <b>0.025</b> | 1            | 0.60     | 0.438    |

## **Electronic supplementary material B**

### **Materials and methods**

#### **SIMPLE COST-BENEFIT ANALYSES OF TAILORED FLOWER STRIPS UNDER DIFFERENT SCENARIOS**

For an economic evaluation of tailored flower strips we analysed simple cost-benefit scenarios (electronic supplementary material Table S5). We compared 6 scenarios under conventional (2 scenarios) and organic (4 scenarios) winter wheat production, with combinations of flower strip treatments (no flower strip vs. sown 3 m-wide flower strip) and insecticide input (yes vs. no; only for conventional scenarios) for a 1 ha field with the dimensions of 200 m \* 50 m. For winter wheat and flower strips we used Swiss average costs and benefits under conventional or organic management, respectively [1] (electronic supplementary material Table S6). For conventional production we assumed that either insecticide treatment or a tailored flower strip is used to reduce CLB density below the economic threshold (assuming equal effectiveness). For organic management we used scenarios under which flower strips increase winter wheat yield (or mitigate yield loss, respectively) by 2.5%; 5% or 10%, based on published and own unpublished empirical data on the negative relationship between CLB numbers (numbers of larvae per tiller) and winter wheat yield (2.5%: [4]; 10%: M. Tschumi, unpublished data; 5%: intermediate scenario).

**Table S5:** Cost-benefit analysis scenarios. Combinations of different flower strip treatments (No: field without flower strip; Yes: 3 m-wide tailored flower strip sown into the field) and insecticide input (Yes vs. No) were evaluated under standard conventional and organic management for a 1 ha (200 m \* 50 m) winter wheat field. Organic management includes scenarios under which flower strips increase winter wheat yield (or mitigate yield loss, respectively) by 2.5%; 5% or 10% (see Material and methods of electronic supplementary material).

| Scenario No. | Management regime | Flower strip | Insecticide input | Yield increase [%] |
|--------------|-------------------|--------------|-------------------|--------------------|
| 1            | Conventional      | No           | Yes               | 0                  |
| 2            | Conventional      | Yes          | No                | 0                  |
| 3            | Organic           | No           | No                | 0                  |
| 4            | Organic           | Yes          | No                | 2.5                |
| 5            | Organic           | Yes          | No                | 5                  |
| 6            | Organic           | Yes          | No                | 10                 |

**Table S6:** Average costs and benefits for flower strip establishment and management, and winter wheat production (per ha) under conventional or organic management, respectively (in CHF) in Switzerland. If not indicated in footnotes, data derive from [1].

|                      | <b>Flower strip (Conventional)</b> |                   |                | <b>Flower strip (Organic)</b> |                   |                | <b>Winter wheat (Conventional)</b> |                   |                | <b>Winter wheat (Organic)</b> |                   |                |
|----------------------|------------------------------------|-------------------|----------------|-------------------------------|-------------------|----------------|------------------------------------|-------------------|----------------|-------------------------------|-------------------|----------------|
|                      | Quantity<br>(Q)                    | Price pQ<br>[CHF] | Price<br>[CHF] | Quantity<br>(Q)               | Price pQ<br>[CHF] | Price<br>[CHF] | Quantity<br>(Q)                    | Price pQ<br>[CHF] | Price<br>[CHF] | Quantity<br>(Q)               | Price pQ<br>[CHF] | Price<br>[CHF] |
| <b>Costs</b>         |                                    |                   |                |                               |                   |                |                                    |                   |                |                               |                   |                |
| Seeds                | 11.0 kg                            | 45.45             | 500            | 11.0 kg                       | 45.45             | 500            | 180.0 kg                           | 1.29              | 232.20         | 200.0 kg                      | 1.93              | 386.00         |
| Fertilizers          |                                    |                   | 0.00           |                               |                   | 0.00           |                                    |                   | 407.00         |                               |                   | 40.00          |
| Herbicides           |                                    |                   | 0.00           |                               |                   | 0.00           | 1.0 bin                            | 86.40             | 86.40          |                               |                   | 0.00           |
| Fungicides           |                                    |                   | 0.00           |                               |                   | 0.00           | 2.0 bin                            | 77.50             | 155.00         |                               |                   | 0.00           |
| Insecticides*        |                                    |                   | 0.00           |                               |                   | 0.00           |                                    |                   | 85.00          |                               |                   | 0.00           |
| Growth regulators    |                                    |                   | 0.00           |                               |                   | 0.00           | 1.0 bin                            | 48.10             | 48.10          |                               |                   | 0.00           |
| Hail insurance       |                                    |                   | 0.00           |                               |                   | 0.00           | 2.3 %                              | 3630.50           | 83.50          | 2.3 %                         | 4452.00           | 102.40         |
| Yield cleaning       |                                    |                   | 0.00           |                               |                   | 0.00           | 71.1 dt                            | 2.85              | 202.64         | 43.7 dt                       | 4.35              | 190.10         |
| Yield drying         |                                    |                   | 0.00           |                               |                   | 0.00           | 71.1 dt                            | 1.10              | 78.21          | 43.7 dt                       | 1.10              | 48.07          |
| Various fees         |                                    |                   | 0.00           |                               |                   | 0.00           |                                    |                   | 64.31          |                               |                   | 5.15           |
| Threshing            |                                    |                   | 0.00           |                               |                   | 0.00           |                                    |                   | 436.00         |                               |                   | 436.00         |
| Machine costs†       |                                    |                   | 358.00         |                               |                   | 371.00         |                                    |                   | 472.50         |                               |                   | 699.00         |
| Labour†              | 19.0 h                             | 28.00             | 532.00         | 20.0 h                        | 28.00             | 560.00         | 40.5 h                             | 28.00             | 1134.00        | 53.0 h                        | 28.00             | 1484.00        |
| <b>Total costs</b>   |                                    |                   | 1390.00        |                               |                   | 1431.00        |                                    |                   | 2350.85        |                               |                   | 1906.71        |
| <b>Benefits</b>      |                                    |                   |                |                               |                   |                |                                    |                   |                |                               |                   |                |
| Product              |                                    |                   | 0.00           |                               |                   | 0.00           | 68.5 dt                            | 53.00             | 3630.50        | 42.0 dt                       | 106.00            | 4452.00        |
| <b>Total benefit</b> |                                    |                   | 0.00           |                               |                   | 0.00           |                                    |                   | 3630.50        |                               |                   | 4452.00        |

\*[3]

†Basic costs from [1] including extra costs for insecticide applications (conventional wheat production) following [3]

## Results

### SIMPLE COST-BENEFIT ANALYSES OF TAILORED FLOWER STRIPS UNDER DIFFERENT SCENARIOS

Costs for flower strips are low, as generally no management is needed after sowing (low machine and labour costs). Thus, a 3 m \* 200 m tailored flower strip is less expensive than an average insecticide treatment of 1 ha winter wheat (electronic supplementary material Table S7). A 3 m \* 200 m tailored flower strip is therefore economically viable to replace insecticides under conventional management assuming comparable pest control effectiveness of pesticides and tailored flower strips (electronic supplementary material Table S7; scenarios no. 1-2). Under organic management, tailored flower strips are profitable if yield increase is  $\geq 3.7\%$  (electronic supplementary material Table S7; scenarios No. 3-6).

**Table S7:** Cost-benefit analysis for different tailored flower strip scenarios (see Table S5). Total payoff of different scenarios is calculated from costs and benefits of a 1 ha winter wheat field (200 m \* 50 m).

| Scenario                                               | Conventional  |               | Organic        |                |                |                |
|--------------------------------------------------------|---------------|---------------|----------------|----------------|----------------|----------------|
|                                                        | 1             | 2             | 3              | 4              | 5              | 6              |
| <b>WINTER WHEAT</b>                                    |               |               |                |                |                |                |
| <i>Length [m]</i>                                      | 200.00        | 200.00        | 200.00         | 200.00         | 200.00         | 200.00         |
| <i>Width [m]</i>                                       | 50.00         | 47.00         | 50.00          | 47.00          | 47.00          | 47.00          |
| <i>Size [ha]</i>                                       | 1.00          | 0.94          | 1.00           | 0.94           | 0.94           | 0.94           |
| <b>Costs</b>                                           |               |               |                |                |                |                |
| Seeds                                                  | 232.20        | 218.27        | 386.00         | 362.84         | 362.84         | 362.84         |
| Fertilizers                                            | 407.00        | 382.58        | 40.00          | 37.60          | 37.60          | 37.60          |
| Herbicides                                             | 86.40         | 81.22         | 0.00           | 0.00           | 0.00           | 0.00           |
| Fungicides                                             | 155.00        | 145.70        | 0.00           | 0.00           | 0.00           | 0.00           |
| Insecticides                                           | 85.00         | 0.00          | 0.00           | 0.00           | 0.00           | 0.00           |
| Growth regulators                                      | 48.10         | 45.21         | 0.00           | 0.00           | 0.00           | 0.00           |
| Hail insurance                                         | 83.50         | 78.49         | 102.40         | 96.25          | 96.25          | 96.25          |
| Yield cleaning                                         | 202.64        | 190.48        | 190.10         | 183.16         | 187.62         | 196.56         |
| Yield drying                                           | 78.21         | 73.52         | 48.07          | 46.32          | 47.45          | 49.70          |
| Various fees                                           | 64.31         | 60.45         | 5.15           | 4.84           | 4.84           | 4.84           |
| Threshing                                              | 436.00        | 409.84        | 436.00         | 409.84         | 409.84         | 409.84         |
| Machine costs                                          | 472.50        | 419.24        | 699.00         | 657.06         | 657.06         | 657.06         |
| Labour                                                 | 1134.00       | 1052.80       | 1484.00        | 1394.96        | 1394.96        | 1394.96        |
| <i>Total costs wheat</i>                               | 3484.85       | 3157.79       | 3390.71        | 3192.86        | 3198.46        | 3209.65        |
| <b>Benefits</b>                                        |               |               |                |                |                |                |
| Product                                                | 3630.50       | 3412.67       | 4452.00        | 4184.88        | 4184.88        | 4184.88        |
| Yield increase*                                        | 0.00          | 0.00          | 0.00           | 104.62         | 209.24         | 418.49         |
| <i>Total benefits wheat</i>                            | 3630.50       | 3412.67       | 4452.00        | 4289.50        | 4394.12        | 4603.37        |
| <b>FLOWER STRIP</b>                                    |               |               |                |                |                |                |
| <i>Length [m]</i>                                      | 0.00          | 200.00        | 0.00           | 200.00         | 200.00         | 200.00         |
| <i>Width [m]</i>                                       | 0.00          | 3.00          | 0.00           | 3.00           | 3.00           | 3.00           |
| <i>Size [ha]</i>                                       | 0.00          | 0.06          | 0.00           | 0.06           | 0.06           | 0.06           |
| <b>Costs</b>                                           |               |               |                |                |                |                |
| Seeds                                                  | 0.00          | 30.00         | 0.00           | 30.00          | 30.00          | 30.00          |
| Machine costs                                          | 0.00          | 21.48         | 0.00           | 22.26          | 22.26          | 22.26          |
| Labour                                                 | 0.00          | 31.92         | 0.00           | 33.60          | 33.60          | 33.60          |
| <i>Total costs flower strip</i>                        | 0.00          | 83.40         | 0.00           | 85.86          | 85.86          | 85.86          |
| <b>Benefits</b>                                        |               |               |                |                |                |                |
| <i>Total benefits flower strip</i>                     | 0.00          | 0.00          | 0.00           | 0.00           | 0.00           | 0.00           |
| <b>Net benefits (total benefits minus total costs)</b> | <b>145.65</b> | <b>171.48</b> | <b>1061.29</b> | <b>1010.78</b> | <b>1109.80</b> | <b>1307.85</b> |

\*Yield increase due to flower strip mediated increase in natural CLB control (according to the scenarios described in electronic supplementary material Table S5)

## References

1. Boessinger, M. et al. 2012 *Deckungsbeiträge - Ausgabe 2012*. Lindau, Lausanne: AGRIDEA.
2. Bundesrat 2015 Verordnung über die Direktzahlungen an die Landwirtschaft (Direktzahlungsverordnung, DZV) vom 23. Oktober 2013 (Stand am 1. Januar 2015).
3. Mouron, P., Calabrese, C., Breitenmoser, S., Spycher, S. & Baur, R. 2013 Nachhaltigkeitsbewertung von Insektiziden im Getreide- und Kartoffelanbau der Schweiz. *Agrar. Schweiz* **4**, 368–375.
4. Buntin, G. D., Flanders, K. L., Slaughter, R. W. & DeLamar, Z. D. 2004 Damage loss assessment and control of the cereal leaf beetle (Coleoptera: Chrysomelidae) in winter wheat. *J. Econ. Entomol.* **97**, 374–382. (doi:10.1603/0022-0493-97.2.374)
